# Supplementary material
Source: publisher site journal article supplement (https://www.dovepress.com/article/506489)
Supplement: Supplementary file 1 [file get_supplementary_file.php]

Supplementary


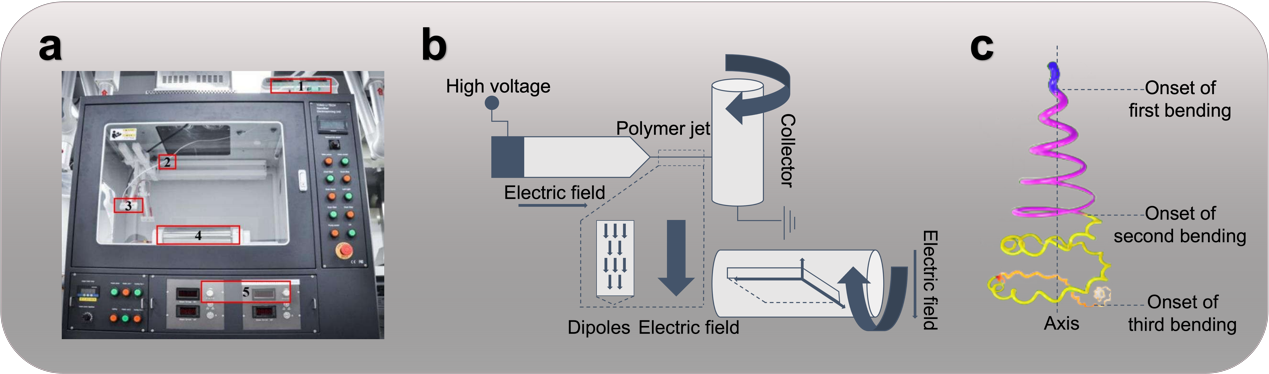


**Figure S1.** a. Electrospinning machine: 1-pump, 2-tube, 3-needle as positive electrode, 4-drum as negative electrode, 5-voltage knob; b. Schematic of polarization direction during the electrospinning process; c. Path of the electrospinning jet.


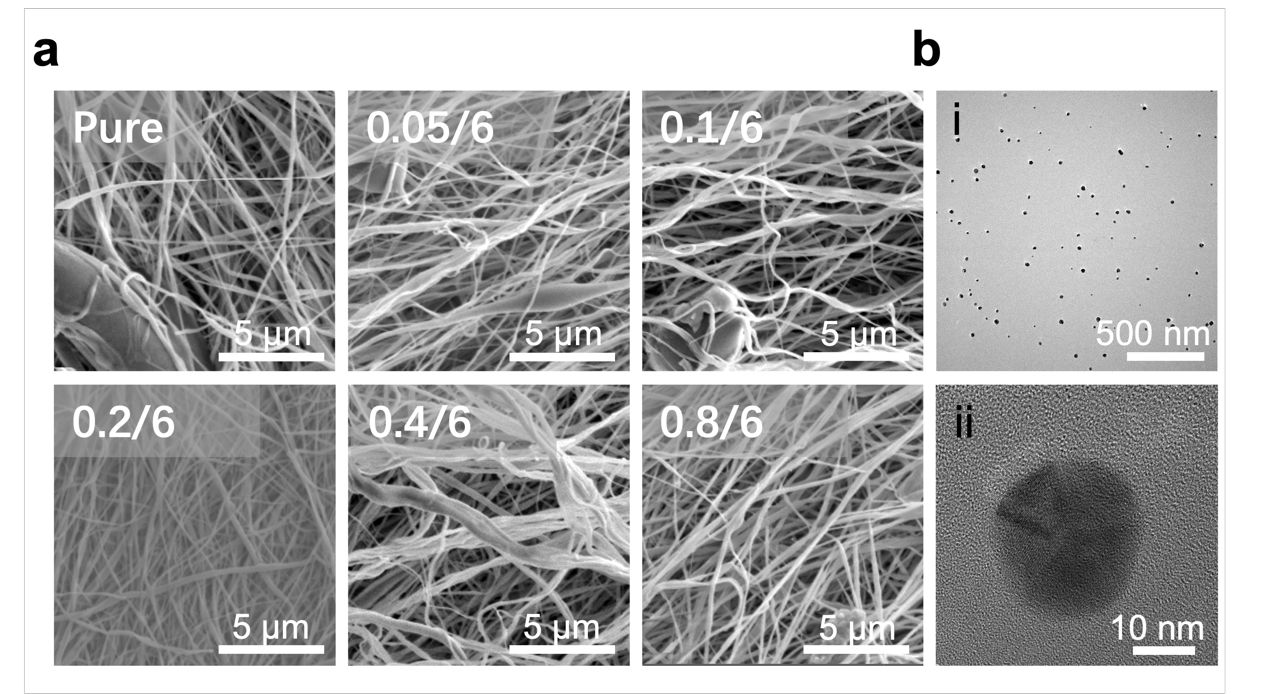


**Figure S2.** Scanning electron microscopy (SEM) performance and analysis of silver nanoparticle (AgNP) size distribution for pure PVDF membranes and fibrous dressings at different AgNPs/PVDF ratios.

(Fig S2a) SEM images of each material group are shown in Fig S2a. For the pure PVDF membrane and the 0.05/6, 0.1/6, 0.4/6, and 0.8/6 groups, bead formation and uneven fiber spacing, caused by jet instability, as well as fiber bending were observed. In contrast, the 0.2/6 group displayed a more uniform fiber network with no significant bead formation. The scale bar is 10 μm.

(Fig S2b) The size of the silver nanoparticles (AgNPs) released from the materials ranged between 9-24 nm, with minor aggregation observed (i, ii). Except for the 0.4/6 and 0.8/6 groups, the amount of AgNPs released from the materials was relatively low, which provides a clearer direction for selecting the optimal AgNPs/PVDF mass ratio in subsequent studies.


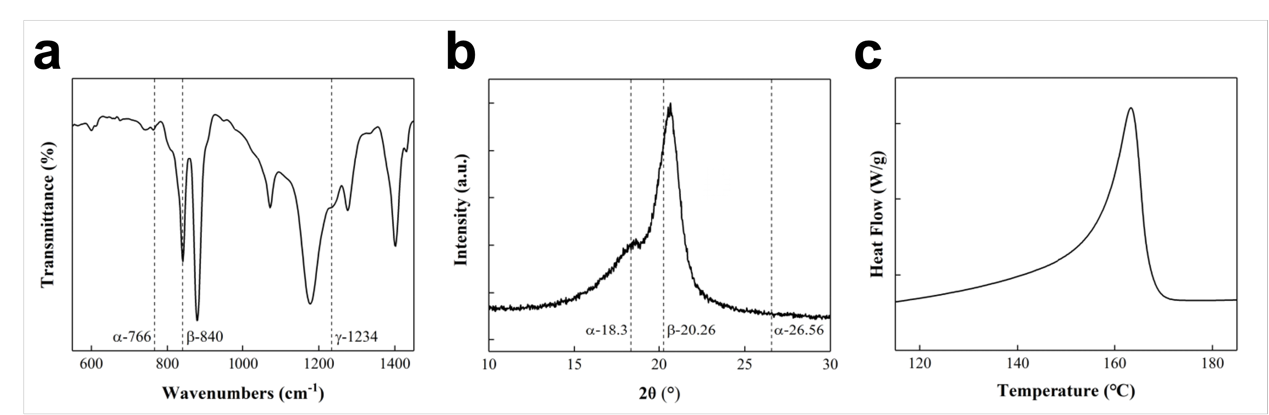


**Figure S3.**  Refinement characterization of the phase structure in the AgNPs/PVDF 0.2/6 group.

FTIR characterization results indicate that the relative intensities of the peaks corresponding to the α-phase and γ-phase decrease after the addition of AgNPs, while the proportion of the β-phase increases with the AgNPs content. This suggests that the surface charges of the silver nanoparticles can promote the rotation of nearby PVDF molecular chains, leading to the formation of the β-phase (Fig S3a). XRD analysis shows that the characteristic peaks of the α-phase remain in the pure PVDF membrane after electrospinning, whereas in the 0.2/6 group, the γ-phase peaks are absent, and the β-phase becomes the dominant structure in the electrospun membrane, which is beneficial for enhancing the piezoelectric effect (Fig S3b). According to the DSC analysis, the shape of the peaks is essentially unaffected by the AgNPs concentration, indicating that the addition of silver has minimal influence on the melting behavior of PVDF. However, the crystallinity decreases and the melting point lowers as the AgNPs content increases


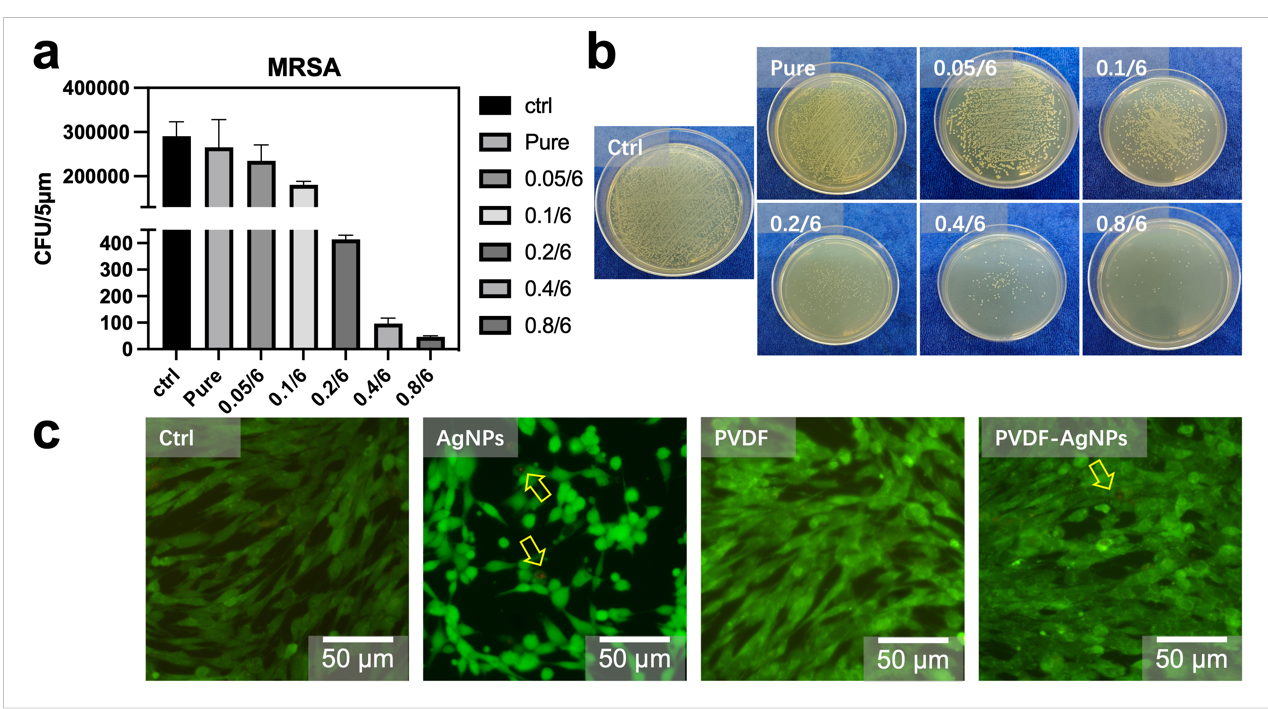


**Figure S4.** Place each group of materials into bacterial culture media in 10 mL centrifuge tubes according to the experimental design, with one control group as a reference. Methicillin-resistant Staphylococcus aureus (MRSA) colonies were gently collected using an inoculation loop and cultured in a shaking incubator. After 12 hours, 5 μL of culture media was extracted from each tube, and the colony-forming units (CFU) were evaluated using the spread plate method. The results showed that the 0.2/6, 0.4/6, and 0.8/6 groups exhibited significant antibacterial effects, with fewer colonies that were visually discernible. In contrast, the control group, pure PVDF group, and the 0.05/6 and 0.1/6 groups had a higher number of colonies, which were so numerous that they spread across the plate and were uncountable to the naked eye (Fig S4b). Statistical analysis further confirmed that the 0.2/6, 0.4/6, and 0.8/6 groups had significantly enhanced antibacterial effects, indicating that PVDF-AgNPs exhibit good resistance to drug-resistant bacteria such as MRSA, Escherichia coli (Gram-negative), and Staphylococcus aureus (Gram-positive). Note: Data are presented as mean ± SD (n = 3)

As shown in Fig S4c, after 24 hours, the live/dead fluorescence staining revealed that the AgNPs groups displayed a higher intensity of red fluorescence signals, indicating more dead cells, and the total number of cells was lower compared to the other groups, with a lower live/dead cell ratio. The control and pure PVDF groups showed much weaker red fluorescence signals, with almost no dead cells visible. In the PVDF-AgNPs groups, only a small amount of red fluorescence was observed, suggesting minimal cytotoxicity and good biocompatibility of the materials.

**
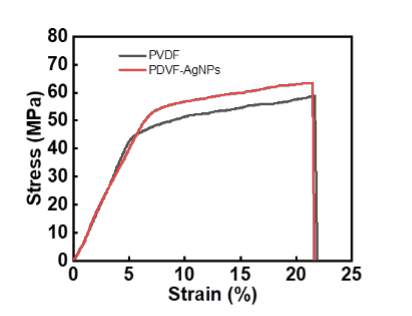
**

**Figure S5.** The tensile strength of PVDF-AgNPs and PVDF dressings. The tensile strength of PVDF is 54.2 MPa, whereas that of PVDF-AgNPs is slightly higher at 66.7 MPa. Additionally, the elongation at break for PVDF is 151.4%, while PVDF-AgNPs exhibit a slightly lower elongation at break of 148.5%.

**
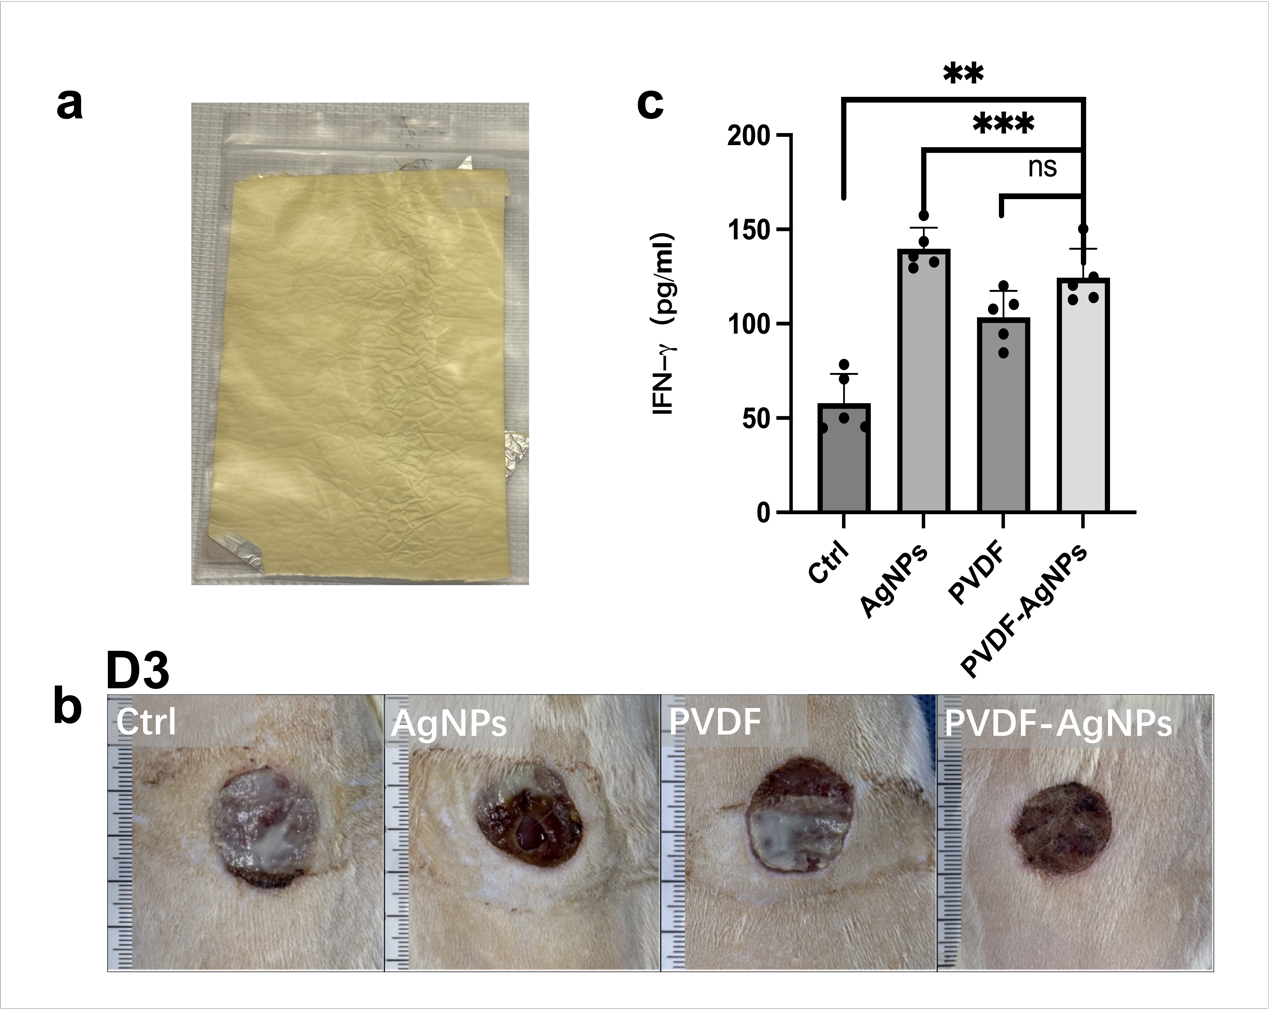
Figure S6.** Figure S6a presents the morphology of the final synthesized PVDF-AgNPs fiber dressing. Fig S6b depicts observations on the third day after establishing the Staphylococcus aureus infection wound model. After removing the dressings, varying degrees of inflammation were visible across all groups. The wounds on the dorsal skin of rats in the Ctrl, AgNPs, and PVDF groups showed significant bacterial colonization and tissue damage, with biofilm formation observed on the wound surface, indicating severe infection. In contrast, the PVDF-AgNPs group, when covered with the dressing, exhibited milder signs of local infection.

Fig S6c shows the quantitative analysis of IFN-γ on day 12 of wound healing. Interferon-γ (IFN-γ) stimulates M1 macrophages, which dominate in the early stages of wound healing. The PVDF-AgNPs group displayed lower levels of IFN-γ compared to the control group, though no significant difference was observed between the PVDF-AgNPs and PVDF groups. Note: Data are presented as mean ± SD (n = 5), **P < 0.01, ***P < 0.005, n.s.: not significant.
